# Supplementary material for: 3d–4f heterometallic trinuclear complexes derived from amine-phenol tripodal ligands exhibiting magnetic and luminescent properties
Source: Royal Society of Chemistry journal article supplement (doi:10.1039/c6dt04027f), 2016-12-12
Supplement: c6dt04027f1.pdf [file c6dt04027f1.pdf]

## ***Electronic Supplementary Information (ESI)***

### **3d–4f Heterometallic trinuclear complexes derived from amine-phenol tripodal ligand exhibiting magnetic and luminescent properties**

**He-Rui Wen,<sup>\*a</sup> Piao-Ping Dong,<sup>a</sup> Sui-Jun Liu,<sup>a</sup> Jin-Sheng Liao,<sup>a</sup> Fu-Yong Liang<sup>a</sup> and Cai-Ming Liu<sup>\*b</sup>**

*<sup>a</sup>School of Metallurgical and Chemical Engineering, Jiangxi University of Science and Technology, Ganzhou, 341000, China. E-mail: wenherui63@163.com (H.-R. Wen)*

*<sup>b</sup>Beijing National Laboratory for Molecular Sciences, Center for Molecular Science, Institute of Chemistry, Chinese Academy of Sciences, Beijing 100190, China. E-mail: cmliu@iccas.ac.cn (C.-M. Liu)*

**Table S1.** Selected bond lengths (Å) and angles (deg) for **1**

|             |            |             |            |
|-------------|------------|-------------|------------|
| Gd1—O8      | 2.193(4)   | Ni1—O3      | 2.075(4)   |
| Gd1—O9      | 2.327(3)   | Ni1—N1      | 2.134(5)   |
| Gd1—O5      | 2.334(4)   | Ni1—N2      | 2.154(5)   |
| Gd1—O11     | 2.342(4)   | Ni1—N4      | 2.236(5)   |
| Gd1—O3      | 2.370(4)   | Ni2—O9      | 2.057(4)   |
| Gd1—O4      | 2.594(4)   | Ni2—O11     | 2.065(3)   |
| Gd1—O10     | 2.603(4)   | Ni2—N8      | 2.073(4)   |
| Gd1—O2      | 2.654(4)   | Ni2—N6      | 2.111(5)   |
| Ni1—O5      | 2.059(4)   | Ni2—N5      | 2.145(5)   |
| Ni1—N3      | 2.068(4)   | Ni2—N7      | 2.202(5)   |
| O8—Gd1—O9   | 96.47(13)  | O5—Ni1—O3   | 76.13(14)  |
| O8—Gd1—O5   | 139.77(14) | N3—Ni1—O3   | 90.29(16)  |
| O9—Gd1—O5   | 86.40(12)  | O5—Ni1—N1   | 80.26(16)  |
| O8—Gd1—O11  | 87.09(14)  | N3—Ni1—N1   | 99.91(18)  |
| O9—Gd1—O11  | 67.32(12)  | O3—Ni1—N1   | 95.84(16)  |
| O5—Gd1—O11  | 129.82(13) | O5—Ni1—N2   | 110.73(16) |
| O8—Gd1—O3   | 146.23(13) | N3—Ni1—N2   | 82.70(18)  |
| O9—Gd1—O3   | 109.18(12) | O3—Ni1—N2   | 171.84(16) |
| O5—Gd1—O3   | 65.59(12)  | N1—Ni1—N2   | 81.35(18)  |
| O11—Gd1—O3  | 83.14(13)  | O5—Ni1—N4   | 85.09(15)  |
| O8—Gd1—O4   | 82.99(13)  | N3—Ni1—N4   | 100.06(17) |
| O9—Gd1—O4   | 142.09(12) | O3—Ni1—N4   | 104.44(16) |
| O5—Gd1—O4   | 118.09(12) | N1—Ni1—N4   | 151.32(18) |
| O11—Gd1—O4  | 74.80(12)  | N2—Ni1—N4   | 81.00(17)  |
| O3—Gd1—O4   | 63.26(12)  | O9—Ni2—O11  | 77.80(14)  |
| O8—Gd1—O10  | 73.68(13)  | O9—Ni2—N8   | 90.81(16)  |
| O9—Gd1—O10  | 64.09(12)  | O11—Ni2—N8  | 168.56(17) |
| O5—Gd1—O10  | 71.70(12)  | O9—Ni2—N6   | 173.84(16) |
| O11—Gd1—O10 | 124.55(12) | O11—Ni2—N6  | 107.26(17) |
| O3—Gd1—O10  | 137.18(12) | N8—Ni2—N6   | 84.04(18)  |
| O4—Gd1—O10  | 147.84(12) | O9—Ni2—N5   | 95.16(16)  |
| O8—Gd1—O2   | 69.49(14)  | O11—Ni2—N5  | 80.85(16)  |
| O9—Gd1—O2   | 145.26(12) | N8—Ni2—N5   | 99.30(18)  |
| O5—Gd1—O2   | 85.50(13)  | N6—Ni2—N5   | 82.38(19)  |
| O11—Gd1—O2  | 139.28(13) | O9—Ni2—N7   | 101.97(17) |
| O3—Gd1—O2   | 97.96(12)  | O11—Ni2—N7  | 85.66(16)  |
| O4—Gd1—O2   | 69.78(12)  | N8—Ni2—N7   | 97.95(19)  |
| O10—Gd1—O2  | 81.30(12)  | N6—Ni2—N7   | 82.15(19)  |
| O5—Ni1—N3   | 166.33(17) | N5—Ni2—N7   | 155.43(18) |
| Ni1—O3—Gd1  | 108.02(15) | Ni2—O9—Gd1  | 107.21(15) |
| Ni1—O5—Gd1  | 109.92(15) | Ni2—O11—Gd1 | 106.40(15) |

**Table S2.** Selected bond lengths (Å) and angles (deg) for **2**

|             |            |            |            |
|-------------|------------|------------|------------|
| Dy1—O8      | 2.142(4)   | Ni1—O5     | 2.069(3)   |
| Dy1—O9      | 2.281(3)   | Ni1—N1     | 2.097(4)   |
| Dy1—O5      | 2.286(4)   | Ni1—N2     | 2.129(5)   |
| Dy1—O11     | 2.303(4)   | Ni1—N4     | 2.227(5)   |
| Dy1—O3      | 2.329(3)   | Ni2—O9     | 2.040(4)   |
| Dy1—O4      | 2.580(4)   | Ni2—O11    | 2.042(3)   |
| Dy1—O10     | 2.607(4)   | Ni2—N8     | 2.052(5)   |
| Dy1—O2      | 2.646(4)   | Ni2—N6     | 2.101(5)   |
| Ni1—O3      | 2.052(4)   | Ni2—N5     | 2.120(5)   |
| Ni1—N3      | 2.068(5)   | Ni2—N7     | 2.192(5)   |
| O8—Dy1—O9   | 96.94(14)  | O3—Ni1—O5  | 76.52(14)  |
| O8—Dy1—O5   | 138.04(14) | N3—Ni1—O5  | 166.19(16) |
| O9—Dy1—O5   | 86.41(12)  | O3—Ni1—N1  | 96.09(16)  |
| O8—Dy1—O11  | 88.37(14)  | N3—Ni1—N1  | 99.86(19)  |
| O9—Dy1—O11  | 68.13(12)  | O5—Ni1—N1  | 80.79(16)  |
| O5—Dy1—O11  | 130.50(13) | O3—Ni1—N2  | 171.82(16) |
| O8—Dy1—O3   | 145.35(14) | N3—Ni1—N2  | 83.19(18)  |
| O9—Dy1—O3   | 110.09(13) | O5—Ni1—N2  | 110.45(16) |
| O5—Dy1—O3   | 67.15(12)  | N1—Ni1—N2  | 81.19(18)  |
| O11—Dy1—O3  | 82.30(13)  | O3—Ni1—N4  | 104.66(17) |
| O8—Dy1—O4   | 82.73(13)  | N3—Ni1—N4  | 99.93(19)  |
| O9—Dy1—O4   | 142.84(12) | O5—Ni1—N4  | 84.88(16)  |
| O5—Dy1—O4   | 118.40(12) | N1—Ni1—N4  | 151.24(19) |
| O11—Dy1—O4  | 74.72(12)  | N2—Ni1—N4  | 80.68(19)  |
| O3—Dy1—O4   | 62.62(12)  | O9—Ni2—O11 | 77.94(14)  |
| O8—Dy1—O10  | 72.72(14)  | O9—Ni2—N8  | 89.75(17)  |
| O9—Dy1—O10  | 64.06(12)  | O11—Ni2—N8 | 167.69(17) |
| O5—Dy1—O10  | 71.41(12)  | O9—Ni2—N6  | 173.12(18) |
| O11—Dy1—O10 | 125.20(12) | O11—Ni2—N6 | 107.73(17) |
| O3—Dy1—O10  | 138.48(12) | N8—Ni2—N6  | 84.5(2)    |
| O4—Dy1—O10  | 146.82(12) | O9—Ni2—N5  | 94.43(17)  |
| O8—Dy1—O2   | 69.75(14)  | O11—Ni2—N5 | 81.54(17)  |
| O9—Dy1—O2   | 144.94(13) | N8—Ni2—N5  | 99.1(2)    |
| O5—Dy1—O2   | 83.70(13)  | N6—Ni2—N5  | 82.8(2)    |
| O11—Dy1—O2  | 139.93(13) | O9—Ni2—N7  | 103.63(17) |
| O3—Dy1—O2   | 96.79(12)  | O11—Ni2—N7 | 84.95(17)  |
| O4—Dy1—O2   | 69.66(12)  | N8—Ni2—N7  | 98.7(2)    |
| O10—Dy1—O2  | 80.91(12)  | N6—Ni2—N7  | 81.0(2)    |
| O3—Ni1—N3   | 89.72(16)  | N5—Ni2—N7  | 154.6(2)   |
| Ni2—O11—Dy1 | 105.95(15) | Ni1—O5—Dy1 | 108.56(14) |
| Ni2—O9—Dy1  | 106.82(14) | Ni1—O3—Dy1 | 107.57(14) |

**Table S3.** Selected bond lengths (Å) and angles (deg) for **3**

|             |            |             |            |
|-------------|------------|-------------|------------|
| Gd1—O8      | 2.190(4)   | Zn1—N3      | 2.113(5)   |
| Gd1—O11     | 2.312(4)   | Zn1—N1      | 2.168(5)   |
| Gd1—O5      | 2.313(4)   | Zn1—N2      | 2.236(5)   |
| Gd1—O9      | 2.334(4)   | Zn1—N4      | 2.266(5)   |
| Gd1—O3      | 2.364(4)   | Zn2—O11     | 2.062(4)   |
| Gd1—O4      | 2.604(4)   | Zn2—O9      | 2.071(4)   |
| Gd1—O10     | 2.607(4)   | Zn2—N8      | 2.114(5)   |
| Gd1—O2      | 2.612(4)   | Zn2—N5      | 2.191(5)   |
| Zn1—O3      | 2.083(4)   | Zn2—N6      | 2.196(5)   |
| Zn1—O5      | 2.090(4)   | Zn2—N7      | 2.280(5)   |
| O8—Gd1—O11  | 88.49(15)  | O3—Zn1—N3   | 89.29(17)  |
| O8—Gd1—O5   | 139.27(15) | O5—Zn1—N3   | 165.32(18) |
| O11—Gd1—O5  | 128.67(14) | O3—Zn1—N1   | 98.14(17)  |
| O8—Gd1—O9   | 97.13(14)  | O5—Zn1—N1   | 80.79(17)  |
| O11—Gd1—O9  | 67.49(13)  | N3—Zn1—N1   | 101.71(19) |
| O5—Gd1—O9   | 85.21(13)  | O3—Zn1—N2   | 169.61(16) |
| O8—Gd1—O3   | 146.16(14) | O5—Zn1—N2   | 113.24(17) |
| O11—Gd1—O3  | 81.41(13)  | N3—Zn1—N2   | 81.40(19)  |
| O5—Gd1—O3   | 66.65(13)  | N1—Zn1—N2   | 79.39(18)  |
| O9—Gd1—O3   | 108.36(13) | O3—Zn1—N4   | 107.30(16) |
| O8—Gd1—O4   | 83.53(14)  | O5—Zn1—N4   | 85.34(16)  |
| O11—Gd1—O4  | 74.41(12)  | N3—Zn1—N4   | 99.23(18)  |
| O5—Gd1—O4   | 118.69(13) | N1—Zn1—N4   | 147.06(19) |
| O9—Gd1—O4   | 141.85(13) | N2—Zn1—N4   | 78.93(17)  |
| O3—Gd1—O4   | 62.66(13)  | O11—Zn2—O9  | 77.27(15)  |
| O8—Gd1—O10  | 73.91(14)  | O11—Zn2—N8  | 166.86(18) |
| O11—Gd1—O10 | 124.67(12) | O9—Zn2—N8   | 89.59(17)  |
| O5—Gd1—O10  | 70.94(13)  | O11—Zn2—N5  | 81.96(16)  |
| O9—Gd1—O10  | 63.53(12)  | O9—Zn2—N5   | 96.59(17)  |
| O3—Gd1—O10  | 137.41(13) | N8—Zn2—N5   | 99.9(2)    |
| O4—Gd1—O10  | 149.10(12) | O11—Zn2—N6  | 110.21(17) |
| O8—Gd1—O2   | 69.60(14)  | O9—Zn2—N6   | 171.34(17) |
| O11—Gd1—O2  | 139.66(14) | N8—Zn2—N6   | 82.90(19)  |
| O5—Gd1—O2   | 85.82(14)  | N5—Zn2—N6   | 80.54(19)  |
| O9—Gd1—O2   | 145.85(13) | O11—Zn2—N7  | 84.37(16)  |
| O3—Gd1—O2   | 98.04(13)  | O9—Zn2—N7   | 106.30(17) |
| O4—Gd1—O2   | 69.91(13)  | N8—Zn2—N7   | 99.4(2)    |
| O10—Gd1—O2  | 82.40(12)  | N5—Zn2—N7   | 149.96(19) |
| O3—Zn1—O5   | 76.03(15)  | N6—Zn2—N7   | 79.3(2)    |
| Zn1—O3—Gd1  | 107.71(15) | Zn2—O9—Gd1  | 106.40(15) |
| Zn1—O5—Gd1  | 109.34(16) | Zn2—O11—Gd1 | 107.48(16) |

**Table S4.** Selected bond lengths (Å) and angles (deg) for **4**

|             |            |             |            |
|-------------|------------|-------------|------------|
| Dy1—O8      | 2.171(4)   | Zn1—N3      | 2.116(5)   |
| Dy1—O11     | 2.290(4)   | Zn1—N1      | 2.169(4)   |
| Dy1—O5      | 2.295(3)   | Zn1—N2      | 2.245(5)   |
| Dy1—O9      | 2.310(3)   | Zn1—N4      | 2.267(5)   |
| Dy1—O3      | 2.340(3)   | Zn2—O11     | 2.068(3)   |
| Dy1—O10     | 2.602(4)   | Zn2—O9      | 2.077(4)   |
| Dy1—O4      | 2.614(4)   | Zn2—N8      | 2.112(5)   |
| Dy1—O2      | 2.638(4)   | Zn2—N5      | 2.190(5)   |
| Zn1—O3      | 2.084(4)   | Zn2—N6      | 2.218(5)   |
| Zn1—O5      | 2.102(3)   | Zn2—N7      | 2.278(5)   |
| O8—Dy1—O11  | 88.52(15)  | O3—Zn1—N3   | 89.17(16)  |
| O8—Dy1—O5   | 138.02(14) | O5—Zn1—N3   | 164.73(16) |
| O11—Dy1—O5  | 130.35(13) | O3—Zn1—N1   | 98.44(15)  |
| O8—Dy1—O9   | 97.95(14)  | O5—Zn1—N1   | 81.26(15)  |
| O11—Dy1—O9  | 67.82(12)  | N3—Zn1—N1   | 101.32(18) |
| O5—Dy1—O9   | 85.84(12)  | O3—Zn1—N2   | 169.57(16) |
| O8—Dy1—O3   | 145.78(13) | O5—Zn1—N2   | 113.88(16) |
| O11—Dy1—O3  | 81.73(12)  | N3—Zn1—N2   | 81.34(18)  |
| O5—Dy1—O3   | 67.19(12)  | N1—Zn1—N2   | 79.33(17)  |
| O9—Dy1—O3   | 108.30(12) | O3—Zn1—N4   | 107.51(16) |
| O8—Dy1—O10  | 73.29(14)  | O5—Zn1—N4   | 85.49(16)  |
| O11—Dy1—O10 | 124.83(12) | N3—Zn1—N4   | 99.41(18)  |
| O5—Dy1—O10  | 71.05(12)  | N1—Zn1—N4   | 146.82(18) |
| O9—Dy1—O10  | 64.08(12)  | N2—Zn1—N4   | 78.52(18)  |
| O3—Dy1—O10  | 138.04(12) | O11—Zn2—O9  | 76.51(13)  |
| O8—Dy1—O4   | 82.96(13)  | O11—Zn2—N8  | 165.94(17) |
| O11—Dy1—O4  | 74.32(12)  | O9—Zn2—N8   | 89.45(17)  |
| O5—Dy1—O4   | 118.55(12) | O11—Zn2—N5  | 82.10(16)  |
| O9—Dy1—O4   | 142.06(12) | O9—Zn2—N5   | 96.65(16)  |
| O3—Dy1—O4   | 62.83(12)  | N8—Zn2—N5   | 100.4(2)   |
| O10—Dy1—O4  | 148.09(11) | O11—Zn2—N6  | 111.63(17) |
| O8—Dy1—O2   | 69.89(14)  | O9—Zn2—N6   | 170.66(17) |
| O11—Dy1—O2  | 139.29(13) | N8—Zn2—N6   | 82.4(2)    |
| O5—Dy1—O2   | 84.12(12)  | N5—Zn2—N6   | 80.4(2)    |
| O9—Dy1—O2   | 146.61(13) | O11—Zn2—N7  | 84.51(17)  |
| O3—Dy1—O2   | 96.90(12)  | O9—Zn2—N7   | 107.18(17) |
| O10—Dy1—O2  | 82.54(12)  | N8—Zn2—N7   | 99.3(2)    |
| O4—Dy1—O2   | 69.23(12)  | N5—Zn2—N7   | 149.0(2)   |
| O3—Zn1—O5   | 75.56(13)  | N6—Zn2—N7   | 78.8(2)    |
| Zn1—O3—Dy1  | 108.01(14) | Zn2—O9—Dy1  | 106.72(14) |
| Zn1—O5—Dy1  | 109.07(14) | Zn2—O11—Dy1 | 107.80(15) |

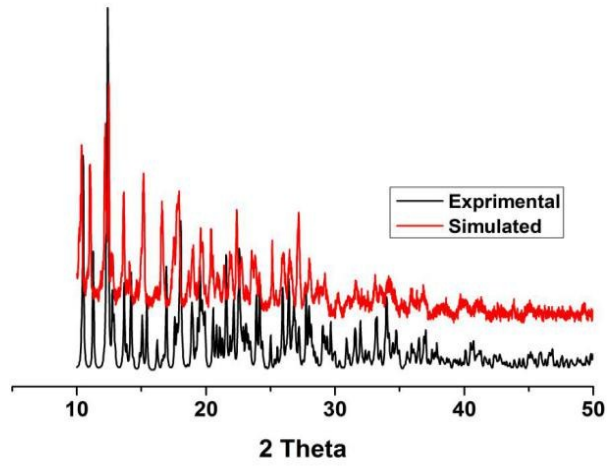

1

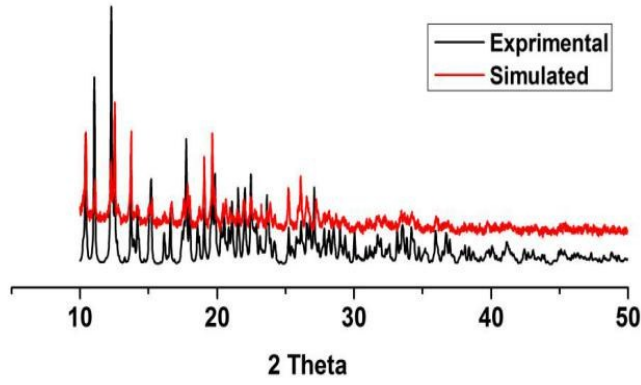

2

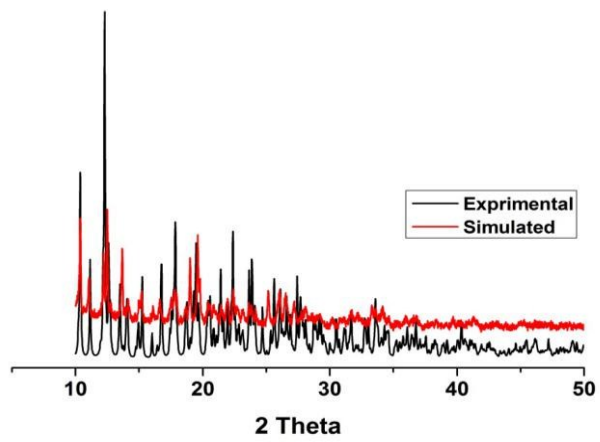

3

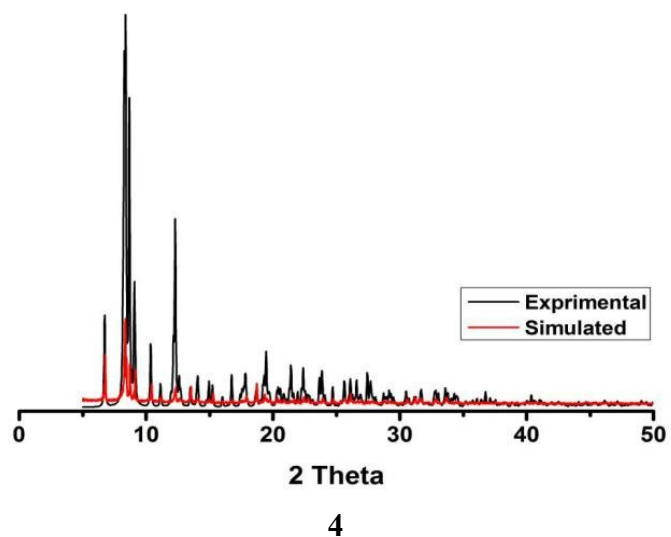

Fig. S1 The PXRD of 1-4

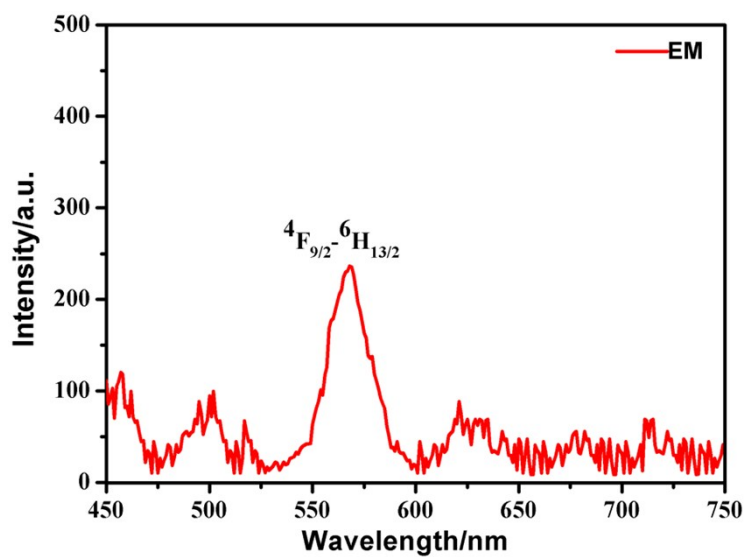

Fig. S2 The emission spectrum of complex 2 at 573 nm ( $\lambda_{ex} = 306$  nm)
